# Supplementary material
Source: HighWire-hosted journal article supplement (https://bmjopenrespres.bmj.com/content/7/1/e000684)
Supplement: inline-supplementary-material-1 [file inline-supplementary-material-1.pdf]

Air pollution &amp; Lung function

Elbarbary et al

Supplementary

**Supplementary Material****Figure 1:** Flowchart of participants numbers included in SAGE wave1 China and exclusion reasons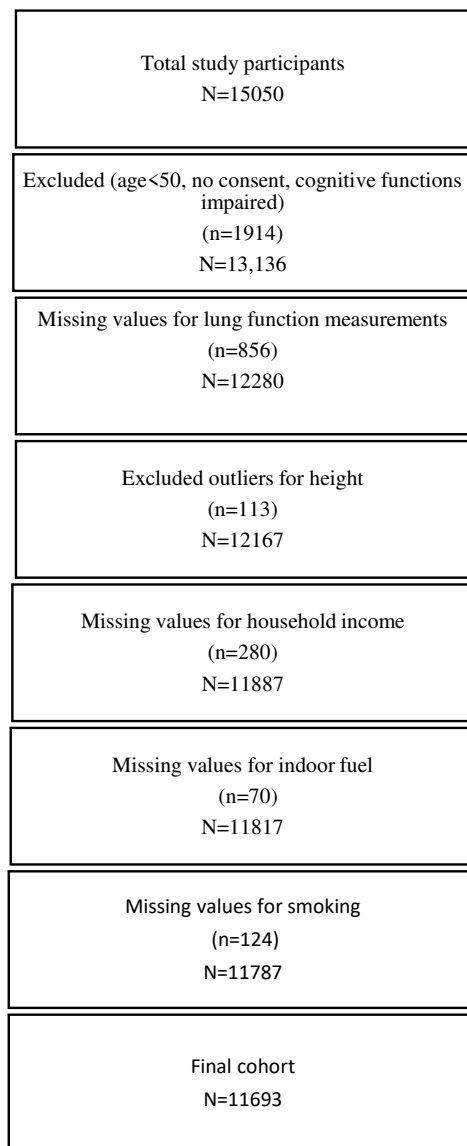**Table S1:** Results of 10-fold cross-validation for PM1, PM2.5, PM10 and NO2

| Pollutants | Daily model       |                        | Annual Averages   |                        |
|------------|-------------------|------------------------|-------------------|------------------------|
|            | CV R <sup>2</sup> | RMSE                   | CV R <sup>2</sup> | RMSE                   |
| PM1        | 55%               | 20.5 µg/m <sup>3</sup> | 75%               | 8.8 µg/m <sup>3</sup>  |
| PM2.5      | 83%               | 18.1 µg/m <sup>3</sup> | 86%               | 6.9 µg/m <sup>3</sup>  |
| PM10       | 78%               | 31.5 µg/m <sup>3</sup> | 81%               | 14.4 µg/m <sup>3</sup> |
| NO2        | 64%               | 12.4 µg/m <sup>3</sup> | 72%               | 6.5 µg/m <sup>3</sup>  |

\*RMSE: Root mean square error; CV: cross-validation

## Air pollution &amp; Lung function

Elbarbary et al

## Supplementary

Table S2 Pollutant descriptive statistics and correlation matrix

| Study Region                                       | PM <sub>10</sub> (µg/m <sup>3</sup> ) | PM <sub>2.5</sub> (µg/m <sup>3</sup> ) | NO <sub>2</sub> (µg/m <sup>3</sup> ) |
|----------------------------------------------------|---------------------------------------|----------------------------------------|--------------------------------------|
| Guangdong                                          | 80.32 (2.91)                          | 51.63 (2.67)                           | 24.30 (4.87)                         |
| Hubei                                              | 108.36 (2.37)                         | 67.64 (2.70)                           | 31.52 (1.58)                         |
| Jilin                                              | 74.70 (3.56)                          | 42.19 (1.85)                           | 20.20 (4.73)                         |
| Shaanxi                                            | 91.24 (19.35)                         | 48.84 (10.41)                          | 24.40 (5.90)                         |
| Shangdong                                          | 135.85 (14.25)                        | 71.28 (11.18)                          | 32.60 (9.85)                         |
| Shanghai                                           | 100.55 (1.12)                         | 69.68 (.77)                            | 46.31 (1.60)                         |
| Yunnan                                             | 47.10 (5.14)                          | 27.90 (4.99)                           | 19.19 (3.49)                         |
| Zhejiang                                           | 83.86 (11.40)                         | 50.96 (7.85)                           | 26.96 (11.94)                        |
| Mean (SD)                                          | 91.11 (28.95)                         | 54.02 (17.02)                          | 28.97 (11.31)                        |
| Median (IQR)                                       | 93.79 (31.15)                         | 55.62 (26.14)                          | 24.18 (22.42)                        |
| <i>Spearman correlation coefficients (p value)</i> |                                       |                                        |                                      |
| PM <sub>10</sub> (µg/m <sup>3</sup> )              | 1                                     | 0.9248 (P<0.001)                       | 0.6146(P<0.001)                      |
| PM <sub>2.5</sub> (µg/m <sup>3</sup> )             |                                       | 1                                      | 0.8182(P<0.001)                      |
| NO <sub>2</sub> (µg/m <sup>3</sup> )               |                                       |                                        | 1                                    |

PM<sub>10</sub>, particulate matter with an aerodynamic diameter less than or equal to 10µm; PM<sub>2.5</sub>, particulate matter with an aerodynamic diameter less than or equal to 2.5µm and NO<sub>2</sub> nitrogen dioxide.

**Table S3:** Sensitivity analysis of the association between COPD prevalence and moving averages of pollutants

| Model Number          | NO <sub>2</sub>   | PM <sub>2.5</sub> | PM <sub>10</sub>  |
|-----------------------|-------------------|-------------------|-------------------|
| †Model 1 <sup>a</sup> | 1.01 (1.42, 1.61) | 1.38 (1.29-1.47)  | 1.21 (1.16-1.31)  |
| †Model2 <sup>b</sup>  | 1.04 (0.98, 1.10) | 1.41 (1.38, 1.44) | 1.30 (1.21, 1.39) |
| †Model3 <sup>c</sup>  | 1.03 (1.35, 1.50) | 1.29 (1.20, 1.38) | 1.18 (1.16, 1.20) |
| ††Model4 <sup>d</sup> | 1.08 (1.35, 1.50) | 1.35 (1.29, 1.41) | 1.23 (1.16, 1.30) |

<sup>a</sup> Excluding participant (n= 3,692) who had cardiovascular comorbidity

<sup>b</sup> Using one-year average IQR increase

<sup>c</sup> Using five-years average IQR increase

<sup>d</sup> Using three-years moving average IQR increase

† Model includes pollutant, age, sex, tobacco use, tobacco consumption physical activity, education, BMI, alcohol, place of residence, household income, type of indoor fuel use, daily fruit and vegetable consumption.

†† Model includes pollutant, age, sex, tobacco use, tobacco consumption physical activity, education, BMI, alcohol, place of residence, household income, gross domestic product (GDP), percentage of the population living in urban areas, type of indoor fuel use, daily fruit and vegetable consumption.

IQR PM<sub>10</sub>: 1 year: 29.60 µg/m<sup>3</sup> and 5 year: 28.02 µg/m<sup>3</sup>

IQR PM<sub>2.5</sub>: 1 year: 26.79 µg/m<sup>3</sup> and 5 year: 26.69 µg/m<sup>3</sup>

IQR NO<sub>2</sub>: 1 year: 21.36 µg/m<sup>3</sup> and 5 year: 22.79 µg/m<sup>3</sup>

Air pollution &amp; Lung function

Elbarbary et al

Supplementary

**Table S4:** Sensitivity analysis of the association between FEV<sub>1</sub> change and moving averages of pollutants

| Model Number           | NO <sub>2</sub>         | PM <sub>2.5</sub>       | PM <sub>10</sub>        |
|------------------------|-------------------------|-------------------------|-------------------------|
| †Model 1 <sup>a</sup>  | -63.17 (-84.00, -36.23) | -73.18 (-84.87, -61.49) | -29.74 (-40.30, -19.18) |
| ††Model 2 <sup>b</sup> | -56.24 (-76.65, -35.83) | -70.63 (-91.78, -49.48) | -34.44 (-46.09, -22.79) |
| ††Model 3 <sup>c</sup> | -62.89 (-77.68, -48.10) | -77.05 (-97.41, -56.69) | -29.95 (-38.94, -20.96) |

<sup>a</sup> Excluding participants (n= 3,692) who had cardiovascular comorbidity<sup>b</sup> Using one-year average IQR increase<sup>c</sup> Using five-years average IQR increase

† Model includes pollutant, age, sex, tobacco use, physical activity, education, BMI, alcohol, place of residence, household income, type of indoor fuel use, daily fruit and vegetables consumption.

†† Model includes pollutant, age, sex, tobacco use, physical activity, education, BMI, alcohol, place of residence, household income, gross domestic product (GDP), percentage of population living in urban areas, type of indoor fuel use, daily fruit and vegetables consumption.

IQR PM<sub>10</sub>: 1 year: 29.60 µg/m<sup>3</sup> and 5 year: 28.02 µg/m<sup>3</sup>IQR PM<sub>2.5</sub>: 1 year: 26.79 µg/m<sup>3</sup> and 5 year: 26.69 µg/m<sup>3</sup>IQR NO<sub>2</sub>: 1 year: 21.36 µg/m<sup>3</sup> and 5 year: 22.79 µg/m<sup>3</sup>
